# Supplementary material for: Susceptibility to DNA Damage as a Molecular Mechanism for Non-Syndromic Cleft Lip and Palate
Source: PubMed Central journal article supplement (PMC3680497; doi:10.1371/journal.pone.0065677), 2013-06-12
Supplement: pone.0065677.s004.pdf [file pone.0065677.s004.pdf]

Table SI: List of DEGs obtained by comparing NSCL/P and control cells

| AffyID  | Symbol                         | Entrez Gene Name                                                                              | Fold change | P-value     |
|---------|--------------------------------|-----------------------------------------------------------------------------------------------|-------------|-------------|
| 8112045 | * * ESM1                       | endothelial cell-specific molecule 1                                                          | -5.330      | ±2.83 0.000 |
| 7922976 | * * PTGS2                      | prostaglandin-endoperoxide synthase 2 (prostaglandin G/H synthase and cyclooxygenase)         | -3.709      | ±2.11 0.000 |
| 8067233 | * * PMEPA1                     | prostate transmembrane protein, androgen induced 1                                            | -3.259      | ±2.01 0.000 |
| 8142981 | * * PODXL                      | podocalyxin-like                                                                              | -2.920      | ±1.89 0.000 |
| 8116780 | * * DSP                        | desmoplakin                                                                                   | -2.736      | ±1.8 0.000  |
| 8100798 | * * SULT1B1                    | sulfotransferase family, cytosolic, 1B, member 1                                              | -2.660      | ±2.37 0.000 |
| 7915612 | * * PTCH2                      | patched 2                                                                                     | -2.598      | ±1.51 0.000 |
| 8124527 | * * HIST1H1B                   | histone cluster 1, H1b                                                                        | -2.587      | ±1.51 0.000 |
| 7973067 | * * PNP                        | purine nucleoside phosphorylase                                                               | -2.578      | ±1.45 0.000 |
| 8151871 | * * CCNE2                      | cyclin E2                                                                                     | -2.577      | ±1.44 0.000 |
| 8091243 | * * PCOLCE2 (includes EG:2657  | procollagen C-endopeptidase enhancer 2                                                        | -2.568      | ±1.58 0.000 |
| 7924461 | * *                            |                                                                                               | -2.567      | ±1.54 0.000 |
| 7939237 | * * C11orf41                   | chromosome 11 open reading frame 41                                                           | -2.485      | ±1.39 0.000 |
| 8059376 | * * SERPINE2                   | serpin peptidase inhibitor, clade E (nexin, plasminogen activator inhibitor type 1), member 2 | -2.463      | ±1.56 0.000 |
| 8105267 | * * ITGA2                      | integrin, alpha 2 (CD49B, alpha 2 subunit of VLA-2 receptor)                                  | -2.440      | ±1.69 0.000 |
| 8045688 | * * TNFAIP6                    | tumor necrosis factor, alpha-induced protein 6                                                | -2.436      | ±1.45 0.000 |
| 7952785 | * * OPCML                      | opioid binding protein/cell adhesion molecule-like                                            | -2.431      | ±1.67 0.000 |
| 7948902 | * * SNHG1                      | small nucleolar RNA host gene 1 (non-protein coding)                                          | -2.418      | ±1.49 0.000 |
| 7939215 | * * C11orf41                   | chromosome 11 open reading frame 41                                                           | -2.410      | ±1.34 0.000 |
| 8180255 | * *                            |                                                                                               | -2.404      | ±1.33 0.000 |
| 8180321 | * *                            |                                                                                               | -2.404      | ±1.33 0.000 |
| 8145793 | * * SNORD13                    | small nucleolar RNA, C/D box 13                                                               | -2.383      | ±1.45 0.000 |
| 7936968 | * * ADAM12                     | ADAM metalloproteinase domain 12                                                              | -2.339      | ±1.67 0.000 |
| 7999754 | * * XYLT1                      | xylosyltransferase I                                                                          | -2.317      | ±1.43 0.000 |
| 7981084 | * * SERPINA9                   | serpin peptidase inhibitor, clade A (alpha-1 antitrypsin, antitrypsin), member 9              | -2.307      | ±1.28 0.000 |
| 7974689 | * * DACT1                      | dapper, antagonist of beta-catenin, homolog 1 (Xenopus laevis)                                | -2.304      | ±1.47 0.000 |
| 8086752 | * *                            |                                                                                               | -2.279      | ±1.5 0.001  |
| 8124388 | * * HIST1H3A (includes others) | histone cluster 1, H3a                                                                        | -2.273      | ±1.29 0.001 |
| 7970793 | * * SLC46A3                    | solute carrier family 46, member 3                                                            | -2.271      | ±1.47 0.000 |
| 7909568 | * * DTL                        | denticleless E3 ubiquitin protein ligase homolog (Drosophila)                                 | -2.268      | ±1.35 0.000 |
| 7897801 | * * RNU5E-1                    | RNA, U5E small nuclear 1                                                                      | -2.240      | ±1.32 0.001 |
| 7996260 | * *                            |                                                                                               | -2.233      | ±1.63 0.000 |
| 8007071 | * * CDC6 (includes EG:23834)   | cell division cycle 6 homolog (S. cerevisiae)                                                 | -2.208      | ±1.31 0.001 |
| 7976812 | * * SNORD113-4                 | small nucleolar RNA, C/D box 113-4                                                            | -2.195      | ±1.61 0.001 |
| 8154233 | * * CD274                      | CD274 molecule                                                                                | -2.184      | ±1.49 0.001 |
| 8156043 | * * PSAT1                      | phosphoserine aminotransferase 1                                                              | -2.151      | ±1.28 0.001 |
| 7940147 | * * FAM111B                    | family with sequence similarity 111, member B                                                 | -2.129      | ±1.24 0.001 |
| 7953218 | * * RAD51AP1                   | RAD51 associated protein 1                                                                    | -2.120      | ±1.26 0.001 |
| 8126798 | * * GPR116                     | G protein-coupled receptor 116                                                                | -2.119      | ±2.36 0.000 |
| 7919642 | * * HIST2H2AB                  | histone cluster 2, H2ab                                                                       | -2.102      | ±1.2 0.002  |
| 8124391 | * * HIST1H2AB/HIST1H2AE        | histone cluster 1, H2ae                                                                       | -2.098      | ±1.24 0.002 |
| 8077499 | * * LINC00312                  | long intergenic non-protein coding RNA 312                                                    | -2.086      | ±1.51 0.001 |
| 7926259 | * * MCM10 (includes EG:307126  | minichromosome maintenance complex component 10                                               | -2.078      | ±1.2 0.002  |
| 8160431 | * * MIR31HG                    | MIR31 host gene (non-protein coding)                                                          | -2.060      | ±1.13 0.002 |
| 7950391 | * * PGM2L1                     | phosphoglucomutase 2-like 1                                                                   | -2.060      | ±1.17 0.002 |
| 7943158 | * * SCARNA9                    | small Cajal body-specific RNA 9                                                               | -2.060      | ±1.27 0.002 |
| 7981978 | * * SNORD116-15                | small nucleolar RNA, C/D box 116-15                                                           | -2.054      | ±1.23 0.002 |
| 8035838 | * * ZNF724P                    | zinc finger protein 724, pseudogene                                                           | -2.037      | ±1.15 0.002 |
| 8092640 | * * RFC4                       | replication factor C (activator 1) 4, 37kDa                                                   | -2.022      | ±1.08 0.002 |
| 8080847 | * * C3orf14                    | chromosome 3 open reading frame 14                                                            | -2.018      | ±1.11 0.002 |
| 8112376 | * * CENPK                      | centromere protein K                                                                          | -2.018      | ±1.16 0.003 |
| 7981982 | * * SNRPN                      | small nuclear ribonucleoprotein polypeptide N                                                 | -2.004      | ±1.2 0.003  |
| 7981986 | * * SNRPN                      | small nuclear ribonucleoprotein polypeptide N                                                 | -2.004      | ±1.2 0.003  |
| 8083876 | * * SKI1                       | SKI-like oncogene                                                                             | -2.002      | ±1.25 0.002 |
| 7927631 | * * DKK1                       | dickkopf 1 homolog (Xenopus laevis)                                                           | -2.002      | ±1.26 0.003 |
| 7922162 | * * SLC19A2                    | solute carrier family 19 (thiamine transporter), member 2                                     | -2.001      | ±1.26 0.001 |
| 7998722 | * * SNORD60                    | small nucleolar RNA, C/D box 60                                                               | -1.997      | ±1.13 0.003 |
| 7906919 | * * RGS4                       | regulator of G-protein signaling 4                                                            | -1.989      | ±1.76 0.002 |
| 7929438 | * * HELLS                      | helicase, lymphoid-specific                                                                   | -1.976      | ±1.18 0.004 |
| 7981976 | * * SNORD116-14                | small nucleolar RNA, C/D box 116-14                                                           | -1.967      | ±1.25 0.004 |
| 8071212 | * * CDC45                      | cell division cycle 45 homolog (S. cerevisiae)                                                | -1.962      | ±1.08 0.004 |
| 7910997 | * * EXO1 (includes EG:26909)   | exonuclease 1                                                                                 | -1.952      | ±1.14 0.004 |
| 8061471 | * * GINS1                      | GINS complex subunit 1 (Psf1 homolog)                                                         | -1.945      | ±1.12 0.004 |
| 8138527 | * * STEAP1B                    | STEAP family member 1B                                                                        | -1.939      | ±1.2 0.004  |
| 8030978 | * * ZNF845                     | zinc finger protein 845                                                                       | -1.938      | ±1.23 0.004 |
| 7919269 | * * GSTM2                      | glutathione S-transferase mu 2 (muscle)                                                       | -1.937      | ±1.09 0.004 |
| 7919349 | * * GSTM2                      | glutathione S-transferase mu 2 (muscle)                                                       | -1.937      | ±1.09 0.004 |
| 8124385 | * * HIST1H4A (includes others) | histone cluster 1, H4a                                                                        | -1.937      | ±1.11 0.004 |
| 7930980 | * * PPAPDC1A                   | phosphatidic acid phosphatase type 2 domain containing 1A                                     | -1.934      | ±1.35 0.003 |
| 8140534 | * * SEMA3C                     | sema domain, immunoglobulin domain (Ig), short basic domain, secreted, (semaphorin) 3C        | -1.933      | ±1.41 0.003 |
| 8004144 | * * MIS12                      | MIS12, MIND kinetochore complex component, homolog (S. pombe)                                 | -1.930      | ±1.05 0.004 |
| 7952339 | * * SNORD14C                   | small nucleolar RNA, C/D box 14C                                                              | -1.929      | ±1.21 0.005 |
| 8081241 | * * C3orf26                    | chromosome 3 open reading frame 26                                                            | -1.927      | ±1.13 0.004 |
| 7995354 | * * ORC6 (includes EG:23594)   | origin recognition complex, subunit 6                                                         | -1.923      | ±1.08 0.004 |
| 8127989 | * * SNORD50B                   | small nucleolar RNA, C/D box 50B                                                              | -1.923      | ±1.1 0.005  |
| 7948904 | * * SNORD28                    | small nucleolar RNA, C/D box 28                                                               | -1.921      | ±1.28 0.005 |
| 7986068 | * * BLM                        | Bloom syndrome, RecQ helicase-like                                                            | -1.920      | ±1.08 0.004 |
| 7973896 | * * GSTM2                      | glutathione S-transferase mu 2 (muscle)                                                       | -1.918      | ±1.05 0.005 |
| 7978568 | * * GSTM2                      | glutathione S-transferase mu 2 (muscle)                                                       | -1.918      | ±1.05 0.005 |
| 7915926 | * * STIL                       | SCL/TAL1 interrupting locus                                                                   | -1.915      | ±1.15 0.004 |
| 7908072 | * * LAMC2                      | laminin, gamma 2                                                                              | -1.914      | ±1.34 0.004 |
| 8141150 | * * ASNS                       | asparagine synthetase (glutamine-hydrolyzing)                                                 | -1.913      | ±1.11 0.004 |
| 7979710 | * * PLEK2                      | pleckstrin 2                                                                                  | -1.913      | ±1.12 0.004 |
| 7964271 | * * PRIM1                      | primase, DNA, polypeptide 1 (49kDa)                                                           | -1.909      | ±1.11 0.004 |
| 8015268 | * * KRT34                      | keratin 34                                                                                    | -1.900      | ±1.1 0.006  |
| 8095574 | * * DCK                        | deoxycytidine kinase                                                                          | -1.899      | ±1.07 0.005 |
| 7964733 | * * RPSAP52                    | ribosomal protein SA pseudogene 52                                                            | -1.899      | ±1.22 0.005 |
| 8025402 | * * ANGPTL4                    | angiopoietin-like 4                                                                           | -1.898      | ±1.06 0.004 |
| 8022674 | * * CDH2                       | cadherin 2, type 1, N-cadherin (neuronal)                                                     | -1.895      | ±1.26 0.003 |
| 7990345 | * * SEMA7A                     | semaphorin 7A, GPI membrane anchor (John Milton Hagen blood group)                            | -1.883      | ±1.37 0.002 |

|         |   |                              |                                                                                                          |        |       |       |
|---------|---|------------------------------|----------------------------------------------------------------------------------------------------------|--------|-------|-------|
| 8142975 | ° | mir-29                       | microRNA 29a                                                                                             | -1.883 | ±1.31 | 0.005 |
| 7981990 | ° |                              |                                                                                                          | -1.881 | ±1.27 | 0.005 |
| 8102787 | ° |                              |                                                                                                          | -1.878 | ±1.05 | 0.006 |
| 8041867 | ° | * MSH2                       | mutS homolog 2, colon cancer, nonpolyposis type 1 (E. coli)                                              | -1.872 | ±1.05 | 0.006 |
| 7965094 | ° | * E2F7                       | E2F transcription factor 7                                                                               | -1.868 | ±1.08 | 0.005 |
| 8052382 | ° | * FANCL                      | Fanconi anemia, complementation group L                                                                  | -1.860 | ±1.06 | 0.007 |
| 8079153 | ° | * ABHD5                      | abhydrolase domain containing 5                                                                          | -1.853 | ±1.02 | 0.007 |
| 7982792 | ° | * RAD51                      | RAD51 homolog (S. cerevisiae)                                                                            | -1.851 | ±1.03 | 0.007 |
| 7898375 | ° | * GSTM2                      | glutathione S-transferase mu 2 (muscle)                                                                  | -1.851 | ±1.03 | 0.007 |
| 7898411 | ° | * GSTM2                      | glutathione S-transferase mu 2 (muscle)                                                                  | -1.851 | ±1.03 | 0.007 |
| 7912800 | ° | * GSTM2                      | glutathione S-transferase mu 2 (muscle)                                                                  | -1.851 | ±1.03 | 0.007 |
| 7912850 | ° | * GSTM2                      | glutathione S-transferase mu 2 (muscle)                                                                  | -1.851 | ±1.03 | 0.007 |
| 7919576 | ° | * GSTM2                      | glutathione S-transferase mu 2 (muscle)                                                                  | -1.851 | ±1.03 | 0.007 |
| 7974882 | ° | * SYT16                      | synaptotagmin XVI                                                                                        | -1.839 | ±1.13 | 0.005 |
| 8144036 | ° | * XRCC2                      | X-ray repair complementing defective repair in Chinese hamster cells 2                                   | -1.832 | ±1.04 | 0.007 |
| 7976621 | ° | * VRK1                       | vaccinia related kinase 1                                                                                | -1.831 | ±1    | 0.007 |
| 8139632 | ° | * FIGNL1                     | figetin-like 1                                                                                           | -1.824 | ±1.06 | 0.008 |
| 8097449 | ° | * PCDH10                     | protocadherin 10                                                                                         | -1.823 | ±1.64 | 0.005 |
| 8003298 | ° | * SLC7A5                     | solute carrier family 7 (amino acid transporter light chain, L system), member 5                         | -1.819 | ±1.09 | 0.007 |
| 8006187 | ° | * ATAD5                      | ATPase family, AAA domain containing 5                                                                   | -1.816 | ±1.11 | 0.007 |
| 7974337 | ° |                              |                                                                                                          | -1.814 | ±1.14 | 0.000 |
| 8086880 | ° | * CDC25A                     | cell division cycle 25 homolog A (S. pombe)                                                              | -1.807 | ±0.99 | 0.009 |
| 8015769 | ° | * BRCA1                      | breast cancer 1, early onset                                                                             | -1.802 | ±1.08 | 0.009 |
| 7983306 | ° | * WDR76                      | WD repeat domain 76                                                                                      | -1.801 | ±1.09 | 0.009 |
| 8127987 | ° | * SNORD50A                   | small nucleolar RNA, C/D box 50A                                                                         | -1.801 | ±1.15 | 0.009 |
| 8117368 | ° | * HIST1H4A (includes others) | histone cluster 1, H4a                                                                                   | -1.800 | ±1.13 | 0.007 |
| 8109830 | ° | * CCDC99                     | coiled-coil domain containing 99                                                                         | -1.798 | ±1.11 | 0.009 |
| 8132843 | ° | * HAUS6                      | HAUS augmin-like complex, subunit 6                                                                      | -1.797 | ±1.08 | 0.007 |
| 8055672 | ° | * MMADHC                     | methylmalonic aciduria (cobalamin deficiency) cblD type, with homocystinuria                             | -1.794 | ±1.05 | 0.010 |
| 7934979 | ° | * ANKRD1                     | ankyrin repeat domain 1 (cardiac muscle)                                                                 | -1.790 | ±2.18 | 0.000 |
| 8114287 | ° | * SPOCK1                     | sparc/osteonectin, cwcv and kazal-like domains proteoglycan (testican) 1                                 | -1.784 | ±1.08 | 0.007 |
| 8152703 | ° | * FBXO32                     | F-box protein 32                                                                                         | -1.784 | ±1.26 | 0.006 |
| 7917771 | ° | * DNTTIP2                    | deoxynucleotidyltransferase, terminal, interacting protein 2                                             | -1.782 | ±1    | 0.000 |
| 8017262 | ° | * BRIP1                      | BRCA1 interacting protein C-terminal helicase 1                                                          | -1.779 | ±1.11 | 0.008 |
| 7914878 | ° | * CLSPN                      | claspin                                                                                                  | -1.773 | ±1.12 | 0.010 |
| 8152582 | ° | * DSCC1                      | defective in sister chromatid cohesion 1 homolog (S. cerevisiae)                                         | -1.772 | ±0.97 | 0.000 |
| 8053797 | ° | * ANKRD36C                   | ankyrin repeat domain 36C                                                                                | -1.768 | ±1.06 | 0.000 |
| 7922846 | ° | * FAM129A                    | family with sequence similarity 129, member A                                                            | -1.763 | ±1.06 | 0.009 |
| 8124537 | ° | * HIST1H3A (includes others) | histone cluster 1, H3a                                                                                   | -1.756 | ±1.05 | 0.000 |
| 7917976 | ° | * SASS6                      | spindle assembly 6 homolog (C. elegans)                                                                  | -1.754 | ±0.99 | 0.000 |
| 8115490 | ° | * ADAM19                     | ADAM metalloproteinase domain 19                                                                         | -1.751 | ±1.32 | 0.004 |
| 7997381 | ° | * CENPN                      | centromere protein N                                                                                     | -1.748 | ±0.99 | 0.000 |
| 8067029 | ° | * KCNG1 (includes EG:241794) | potassium voltage-gated channel, subfamily G, member 1                                                   | -1.746 | ±1.28 | 0.005 |
| 7981953 | ° |                              |                                                                                                          | -1.746 | ±0.99 | 0.000 |
| 7981966 | ° |                              |                                                                                                          | -1.746 | ±0.99 | 0.000 |
| 8034512 | ° | * SNORD41                    | small nucleolar RNA, C/D box 41                                                                          | -1.737 | ±1.03 | 0.000 |
| 8151684 | ° | * MMP16                      | matrix metalloproteinase 16 (membrane-inserted)                                                          | -1.721 | ±1.68 | 0.003 |
| 8054217 | ° | * TXNDC9                     | thioredoxin domain containing 9                                                                          | -1.719 | ±0.94 | 0.000 |
| 8001197 | ° | * NETO2                      | neuropilin (NRP) and tolloid (TLL)-like 2                                                                | -1.715 | ±1.12 | 0.009 |
| 8042830 | ° | * MTHFD2                     | methylenetetrahydrofolate dehydrogenase (NADP+ dependent) 2, methylenetetrahydrofolate cyclohydr         | -1.711 | ±0.96 | 0.000 |
| 7905088 | ° | * HIST2H2AC                  | histone cluster 2, H2ac                                                                                  | -1.709 | ±0.96 | 0.000 |
| 7970763 | ° | * FLT1                       | fms-related tyrosine kinase 1 (vascular endothelial growth factor/vascular permeability factor receptor) | -1.708 | ±1.31 | 0.008 |
| 8066074 | ° | * DSN1 (includes EG:1000029) | DSN1, MIND kinetochore complex component, homolog (S. cerevisiae)                                        | -1.701 | ±0.98 | 0.000 |
| 8042588 | ° | * MPHOSPH10                  | M-phase phosphoprotein 10 (U3 small nucleolar ribonucleoprotein)                                         | -1.700 | ±0.96 | 0.000 |
| 7962579 | ° | * AMIGO2                     | adhesion molecule with Ig-like domain 2                                                                  | -1.699 | ±1.19 | 0.008 |
| 7971077 | ° | * POSTN                      | periostin, osteoblast specific factor                                                                    | -1.691 | ±1.67 | 0.005 |
| 7968351 | ° | * C13orf33                   | chromosome 13 open reading frame 33                                                                      | -1.688 | ±1.4  | 0.006 |
| 7989915 | ° | * TIPIN                      | TIMELESS interacting protein                                                                             | -1.688 | ±0.95 | 0.000 |
| 7950933 | ° | * NOX4                       | NADPH oxidase 4                                                                                          | -1.688 | ±1.48 | 0.007 |
| 7936322 | ° | * GPAM                       | glycerol-3-phosphate acyltransferase, mitochondrial                                                      | -1.664 | ±0.93 | 0.000 |
| 7917182 | ° | * ELTD1                      | EGF, latrophilin and seven transmembrane domain containing 1                                             | -1.642 | ±1.35 | 0.007 |
| 8039484 | ° | * IL11                       | interleukin 11                                                                                           | -1.622 | ±1.35 | 0.008 |
| 8145361 | ° | * NEFM                       | neurofilament, medium polypeptide                                                                        | -1.388 | ±2.23 | 0.003 |
| 7951271 | ° | * MMP1 (includes EG:300339)  | matrix metalloproteinase 1 (interstitial collagenase)                                                    | -1.228 | ±2.5  | 0.004 |
| 7985786 | ° | * ACAN                       | aggrecan                                                                                                 | -1.204 | ±2.3  | 0.006 |
| 8112971 | ° | * HAPLN1                     | hyaluronan and proteoglycan link protein 1                                                               | -0.939 | ±2.16 | 0.009 |
| 7976567 | ° | * BDKRB1                     | bradykinin receptor B1                                                                                   | 1.129  | ±2.02 | 0.009 |
| 8045533 | ° |                              |                                                                                                          | 1.354  | ±1.46 | 0.007 |
| 8015179 | ° |                              |                                                                                                          | 1.384  | ±1.4  | 0.002 |
| 8019588 | ° |                              |                                                                                                          | 1.384  | ±1.4  | 0.002 |
| 7903214 | ° | * LPPR4                      | lipid phosphate phosphatase-related protein type 4                                                       | 1.391  | ±2.01 | 0.001 |
| 8176719 | ° | * EIF1AY                     | eukaryotic translation initiation factor 1A, Y-linked                                                    | 1.412  | ±2.09 | 0.002 |
| 8176375 | ° | * RPS4Y1                     | ribosomal protein S4, Y-linked 1                                                                         | 1.431  | ±2.26 | 0.001 |
| 7999909 | ° | * GPRC5B                     | G protein-coupled receptor, family C, group 5, member B                                                  | 1.434  | ±1.38 | 0.009 |
| 7938225 | ° | * OLFML1                     | olfactomedin-like 1                                                                                      | 1.441  | ±1.04 | 0.009 |
| 7969202 | ° |                              |                                                                                                          | 1.464  | ±1    | 0.009 |
| 8176655 | ° | * NLGN4Y                     | neuroligin 4, Y-linked                                                                                   | 1.466  | ±1.7  | 0.003 |
| 8037240 | ° | * PSG1                       | pregnancy specific beta-1-glycoprotein 1                                                                 | 1.480  | ±1.28 | 0.009 |
| 8013521 | ° |                              |                                                                                                          | 1.482  | ±1.08 | 0.009 |
| 8097288 | ° | * FAT4                       | FAT tumor suppressor homolog 4 (Drosophila)                                                              | 1.487  | ±1.07 | 0.009 |
| 7934185 | ° | * C10orf54                   | chromosome 10 open reading frame 54                                                                      | 1.487  | ±0.87 | 0.008 |
| 7950005 | ° | * MRGPRF                     | MAS-related GPR, member F                                                                                | 1.494  | ±1.14 | 0.007 |
| 8068361 | ° | * SLC5A3                     | solute carrier family 5 (sodium/myo-inositol cotransporter), member 3                                    | 1.512  | ±0.97 | 0.009 |
| 8104758 | ° | * NPR3 (includes EG:18162)   | natriuretic peptide receptor C/guanylate cyclase C (atrionatriuretic peptide receptor C)                 | 1.518  | ±1.16 | 0.005 |
| 7903358 | ° | * VCAM1                      | vascular cell adhesion molecule 1                                                                        | 1.528  | ±1.56 | 0.009 |
| 8058664 | ° |                              |                                                                                                          | 1.536  | ±1.05 | 0.006 |
| 8037657 | ° | * DMPK                       | dystrophin myotonic-protein kinase                                                                       | 1.563  | ±0.9  | 0.004 |
| 7896748 | ° |                              |                                                                                                          | 1.570  | ±1.89 | 0.001 |
| 7911335 | ° |                              |                                                                                                          | 1.571  | ±1.59 | 0.002 |
| 8165694 | ° |                              |                                                                                                          | 1.571  | ±1.59 | 0.002 |
| 8176578 | ° | * USP9Y                      | ubiquitin specific peptidase 9, Y-linked                                                                 | 1.578  | ±1.99 | 0.001 |
| 7975076 | ° | * HSPA2                      | heat shock 70kDa protein 2                                                                               | 1.588  | ±1.23 | 0.005 |
| 8150962 | ° | * TOX                        | thymocyte selection-associated high mobility group box                                                   | 1.635  | ±1.39 | 0.002 |
| 7932254 | ° | * ITGA8                      | integrin, alpha 8                                                                                        | 1.637  | ±1.06 | 0.004 |

|         |                                                            |                                                                                                |       |       |       |
|---------|------------------------------------------------------------|------------------------------------------------------------------------------------------------|-------|-------|-------|
| 8045835 | GALNT5                                                     | UDP-N-acetyl-alpha-D-galactosamine:polypeptide N-acetylgalactosaminyltransferase 5 (GalNAc-T5) | 1.639 | ±1.38 | 0.002 |
| 8176624 | DDX3Y                                                      | DEAD (Asp-Glu-Ala-Asp) box polypeptide 3, Y-linked                                             | 1.644 | ±2.36 | 0.000 |
| 7926875 | BAMBI                                                      | BMP and activin membrane-bound inhibitor homolog ( <i>Xenopus laevis</i> )                     | 1.651 | ±1.02 | 0.003 |
| 8141140 | DLX5                                                       | distal-less homeobox 5                                                                         | 1.660 | ±1.25 | 0.003 |
| 8013523 |                                                            |                                                                                                | 1.662 | ±1.43 | 0.002 |
| 7962058 | TMTC1                                                      | transmembrane and tetratricopeptide repeat containing 1                                        | 1.665 | ±1.66 | 0.002 |
| 7896750 |                                                            |                                                                                                | 1.669 | ±1.55 | 0.002 |
| 7984364 | SMAD3                                                      | SMAD family member 3                                                                           | 1.689 | ±0.93 | 0.002 |
| 8156358 |                                                            |                                                                                                | 1.691 | ±1.9  | 0.001 |
| 8171297 | MID1 (includes EG:10033095 midline 1 (Opitz/BBB syndrome)) |                                                                                                | 1.691 | ±1.2  | 0.003 |
| 8113120 |                                                            |                                                                                                | 1.701 | ±1.22 | 0.002 |
| 8165707 |                                                            |                                                                                                | 1.701 | ±1.22 | 0.002 |
| 8129666 | SLC2A12                                                    | solute carrier family 2 (facilitated glucose transporter), member 12                           | 1.703 | ±1.04 | 0.002 |
| 8112668 | GCNT4                                                      | glucosaminyl (N-acetyl) transferase 4, core 2                                                  | 1.708 | ±1    | 0.002 |
| 7950810 | SYTL2                                                      | synaptotagmin-like 2                                                                           | 1.718 | ±0.99 | 0.002 |
| 8095110 | KIT                                                        | v-kit Hardy-Zuckerman 4 feline sarcoma viral oncogene homolog                                  | 1.722 | ±1.22 | 0.002 |
| 7911343 |                                                            |                                                                                                | 1.727 | ±1.38 | 0.002 |
| 8165703 |                                                            |                                                                                                | 1.727 | ±1.38 | 0.002 |
| 7970565 |                                                            |                                                                                                | 1.731 | ±1.06 | 0.002 |
| 8008965 |                                                            |                                                                                                | 1.738 | ±1.13 | 0.002 |
| 7962559 | SLC38A4                                                    | solute carrier family 38, member 4                                                             | 1.738 | ±1.23 | 0.002 |
| 8052355 | EFEMP1                                                     | EGF containing fibulin-like extracellular matrix protein 1                                     | 1.759 | ±2.09 | 0.001 |
| 8013987 |                                                            |                                                                                                | 1.824 | ±1.21 | 0.001 |
| 8160346 | PTPLAD2                                                    | protein tyrosine phosphatase-like A domain containing 2                                        | 1.831 | ±1.2  | 0.002 |
| 7899615 | SERINC2                                                    | serine incorporator 2                                                                          | 1.843 | ±1.13 | 0.001 |
| 8165663 |                                                            |                                                                                                | 1.863 | ±1.74 | 0.001 |
| 7911337 |                                                            |                                                                                                | 1.865 | ±1.92 | 0.000 |
| 7973871 |                                                            |                                                                                                | 1.865 | ±1.92 | 0.000 |
| 8165696 |                                                            |                                                                                                | 1.865 | ±1.92 | 0.000 |
| 8102831 | MGARP                                                      | mitochondria-localized glutamic acid-rich protein                                              | 1.874 | ±1.21 | 0.001 |
| 8165709 |                                                            |                                                                                                | 1.914 | ±1.26 | 0.001 |
| 7911339 |                                                            |                                                                                                | 1.952 | ±2.12 | 0.000 |
| 8165698 |                                                            |                                                                                                | 1.952 | ±2.12 | 0.000 |
| 8045804 |                                                            |                                                                                                | 2.012 | ±1.98 | 0.000 |
| 8102532 | PDE5A                                                      | phosphodiesterase 5A, cGMP-specific                                                            | 2.024 | ±1.4  | 0.001 |
| 8104746 | NPR3 (includes EG:18162)                                   | natriuretic peptide receptor C/guanylate cyclase C (atriuretic peptide receptor C)             | 2.032 | ±1.38 | 0.000 |
| 7985317 | KIAA1199                                                   | KIAA1199                                                                                       | 2.088 | ±1.9  | 0.000 |
| 8057677 | SLC40A1                                                    | solute carrier family 40 (iron-regulated transporter), member 1                                | 2.169 | ±1.51 | 0.000 |
| 8100310 |                                                            |                                                                                                | 2.221 | ±1.88 | 0.000 |
| 7933204 | C10orf10                                                   | chromosome 10 open reading frame 10                                                            | 2.301 | ±1.43 | 0.000 |
| 8051583 | CYP1B1                                                     | cytochrome P450, family 1, subfamily B, polypeptide 1                                          | 2.318 | ±1.84 | 0.000 |
| 8083887 | CLDN11                                                     | claudin 11                                                                                     | 2.430 | ±1.6  | 0.000 |
| 7912537 | DHRS3                                                      | dehydrogenase/reductase (SDR family) member 3                                                  | 2.441 | ±1.43 | 0.000 |
| 8006433 | CCL2                                                       | chemokine (C-C motif) ligand 2                                                                 | 2.913 | ±2.11 | 0.000 |

(\*) Genes selected by SAM; (\*) Genes selected by Rank Products
