# Supplementary material for: Susceptibility to DNA Damage as a Molecular Mechanism for Non-Syndromic Cleft Lip and Palate
Source: PubMed Central journal article supplement (PMC3680497; doi:10.1371/journal.pone.0065677), 2013-06-12
Supplement: pone.0065677.s005.pdf [file pone.0065677.s005.pdf]

Table SII: Top enriched functions in the IPA interaction network

| Function                   | Function Annotation                                           | p-value  | # Molec. |
|----------------------------|---------------------------------------------------------------|----------|----------|
| <b>Cell Cycle</b>          |                                                               |          |          |
| recombination              | DNA recombination                                             | 5.02E-09 | 7        |
| recombination              | recombination of cells                                        | 5.66E-05 | 3        |
| homologous recombination   | homologous recombination of DNA                               | 4.42E-07 | 4        |
| homologous recombination   | homologous recombination of plasmid DNA                       | 6.58E-05 | 2        |
| homologous recombination   | homologous recombination of cells                             | 3.96E-02 | 1        |
| checkpoint control         | checkpoint control                                            | 4.96E-07 | 6        |
| checkpoint control         | checkpoint control of fibroblast cell lines                   | 1.82E-04 | 2        |
| DNA replication checkpoint | DNA replication checkpoint                                    | 1.99E-06 | 3        |
| G2/M phase                 | G2/M phase                                                    | 2.16E-05 | 6        |
| G2/M phase                 | G2/M phase of tumor cell lines                                | 6.16E-04 | 3        |
| G2/M phase                 | G2/M phase of breast cancer cell lines                        | 1.21E-03 | 2        |
| G2/M phase                 | G2/M phase of cervical cancer cell lines                      | 2.32E-02 | 1        |
| G2/M phase                 | arrest in G2/M phase of breast cancer cell lines              | 3.32E-02 | 1        |
| S phase checkpoint control | S phase checkpoint control of cervical cancer cell lines      | 1.08E-04 | 2        |
| interphase                 | interphase                                                    | 2.96E-04 | 9        |
| interphase                 | arrest in interphase of fibroblast cell lines                 | 1.79E-03 | 3        |
| interphase                 | interphase of breast cancer cell lines                        | 2.22E-03 | 3        |
| interphase                 | arrest in interphase                                          | 1.19E-02 | 5        |
| interphase                 | interphase of cervical cancer cell lines                      | 1.29E-02 | 2        |
| interphase                 | interphase of tumor cell lines                                | 2.64E-02 | 4        |
| interphase                 | arrest in interphase of tumor cell lines                      | 4.69E-02 | 3        |
| sister chromatid exchange  | sister chromatid exchange                                     | 6.67E-04 | 2        |
| sister chromatid exchange  | sister chromatid exchange of DNA                              | 3.70E-03 | 1        |
| sister chromatid exchange  | sister chromatid exchange of chromosomes                      | 4.52E-03 | 1        |
| sister chromatid exchange  | sister chromatid exchange of cervical cancer cell lines       | 6.16E-03 | 1        |
| G1/S phase transition      | arrest in G1/S phase transition                               | 9.41E-04 | 3        |
| G1/S phase transition      | arrest in G1/S phase transition of breast cancer cell lines   | 5.75E-03 | 1        |
| meiosis                    | meiosis of germ cells                                         | 1.27E-03 | 3        |
| meiosis                    | meiosis of primordial germ cells                              | 2.47E-03 | 1        |
| meiosis                    | meiosis of male germ cells                                    | 7.36E-03 | 2        |
| morphology                 | morphology of spindle fibers                                  | 2.22E-03 | 2        |
| S phase                    | S phase                                                       | 2.33E-03 | 5        |
| S phase                    | entry into S phase of tumor cell lines                        | 8.63E-03 | 2        |
| S phase                    | arrest in S phase of keratinocytes                            | 9.43E-03 | 1        |
| S phase                    | arrest in S phase                                             | 1.11E-02 | 2        |
| S phase                    | entry into S phase                                            | 1.42E-02 | 3        |
| S phase                    | S phase of fibroblast cell lines                              | 1.55E-02 | 2        |
| S phase                    | entry into S phase of cervical cancer cell lines              | 2.00E-02 | 1        |
| S phase                    | re-entry into S phase of bone cancer cell lines               | 2.32E-02 | 1        |
| S phase                    | entry into S phase of cancer cells                            | 3.12E-02 | 1        |
| S phase                    | arrest in S phase of fibroblast cell lines                    | 3.72E-02 | 1        |
| S phase                    | entry into S phase of breast cancer cell lines                | 4.71E-02 | 1        |
| G1 phase                   | arrest in G1 phase of breast cancer cell lines                | 3.30E-03 | 2        |
| G1 phase                   | arrest in G1 phase                                            | 1.13E-02 | 4        |
| G1 phase                   | G1 phase of fibroblast cell lines                             | 1.92E-02 | 2        |
| G1 phase                   | arrest in G1 phase of carcinoma cell lines                    | 4.79E-02 | 1        |
| endomitosis                | endomitosis of leukemia cell lines                            | 3.70E-03 | 1        |
| cell cycle progression     | arrest in cell cycle progression of embryonic stem cell lines | 4.11E-03 | 1        |
| mitosis                    | delay in mitosis of breast cancer cell lines                  | 4.11E-03 | 1        |
| mitosis                    | entry into mitosis of embryonic cell lines                    | 8.61E-03 | 1        |
| mitosis                    | entry into mitosis of epithelial cell lines                   | 8.61E-03 | 1        |
| mitosis                    | entry into mitosis of kidney cell lines                       | 1.15E-02 | 1        |
| mitosis                    | entry into mitosis of colon cancer cell lines                 | 1.51E-02 | 1        |
| mitosis                    | mitosis of tumor cell lines                                   | 2.96E-02 | 2        |
| mitosis                    | entry into mitosis of cervical cancer cell lines              | 3.00E-02 | 1        |

|                                                   |                                                          |          |   |
|---------------------------------------------------|----------------------------------------------------------|----------|---|
| progression                                       | progression of chromosomes                               | 4.11E-03 | 1 |
| DNA damage checkpoint                             | DNA damage checkpoint                                    | 5.26E-03 | 2 |
| G2 phase                                          | arrest in G2 phase of endometrial cancer cell lines      | 5.34E-03 | 1 |
| G2 phase                                          | arrest in G2 phase of embryonic stem cells               | 7.38E-03 | 1 |
| G2 phase                                          | arrest in G2 phase                                       | 1.26E-02 | 3 |
| G2 phase                                          | arrest in G2 phase of tumor cell lines                   | 3.63E-02 | 2 |
| G2 phase                                          | arrest in G2 phase of lung cancer cell lines             | 4.19E-02 | 1 |
| G2 phase                                          | arrest in G2 phase of carcinoma cell lines               | 4.59E-02 | 1 |
| organization                                      | organization of chromosomes                              | 6.19E-03 | 2 |
| illegitimate recombination                        | illegitimate recombination of plasmid DNA                | 7.79E-03 | 1 |
| senescence                                        | senescence of fibroblasts                                | 8.58E-03 | 2 |
| aneuploidy                                        | aneuploidy of fibroblasts                                | 8.61E-03 | 1 |
| aneuploidy                                        | aneuploidy of cells                                      | 9.83E-03 | 2 |
| abnormal morphology                               | abnormal morphology of meiotic spindles                  | 9.43E-03 | 1 |
| G2/M phase transition                             | arrest in G2/M phase transition                          | 1.33E-02 | 2 |
| reorganization                                    | reorganization of chromatin                              | 1.47E-02 | 1 |
| homologous pairing                                | homologous pairing of DNA                                | 1.76E-02 | 1 |
| formation                                         | formation of chromosomes                                 | 2.08E-02 | 1 |
| segregation                                       | segregation of chromosomes                               | 2.34E-02 | 2 |
| <b>DNA Replication, Recombination, and Repair</b> |                                                          |          |   |
| recombination                                     | DNA recombination                                        | 5.02E-09 | 7 |
| recombination                                     | recombination of cells                                   | 5.66E-05 | 3 |
| homologous recombination                          | homologous recombination of DNA                          | 4.42E-07 | 4 |
| homologous recombination                          | homologous recombination of plasmid DNA                  | 6.58E-05 | 2 |
| homologous recombination                          | homologous recombination of cells                        | 3.96E-02 | 1 |
| checkpoint control                                | checkpoint control                                       | 4.96E-07 | 6 |
| checkpoint control                                | checkpoint control of fibroblast cell lines              | 1.82E-04 | 2 |
| DNA replication checkpoint                        | DNA replication checkpoint                               | 1.99E-06 | 3 |
| repair                                            | repair of DNA                                            | 7.53E-06 | 7 |
| repair                                            | repair of gene                                           | 1.31E-02 | 1 |
| DNA damage response                               | DNA damage response of cells                             | 8.46E-06 | 6 |
| damage                                            | damage of chromosomes                                    | 1.86E-05 | 4 |
| metabolism                                        | metabolism of DNA                                        | 4.47E-05 | 8 |
| homologous recombination repair                   | homologous recombination repair of DNA                   | 7.07E-05 | 3 |
| formation                                         | formation of chiasmata                                   | 8.55E-05 | 2 |
| formation                                         | formation of nuclear foci                                | 8.94E-05 | 3 |
| formation                                         | formation of chromosome components                       | 6.21E-04 | 3 |
| formation                                         | formation of sex bodies                                  | 4.11E-03 | 1 |
| formation                                         | formation of chromatin                                   | 5.34E-03 | 2 |
| formation                                         | formation of RAD51 nuclear focus                         | 1.23E-02 | 1 |
| formation                                         | formation of chromosomes                                 | 2.08E-02 | 1 |
| S phase checkpoint control                        | S phase checkpoint control of cervical cancer cell lines | 1.08E-04 | 2 |
| progression                                       | progression of replication fork                          | 1.14E-04 | 2 |
| progression                                       | progression of chromosomes                               | 4.11E-03 | 1 |
| replication                                       | DNA replication                                          | 1.17E-04 | 6 |
| replication                                       | initiation of replication of DNA                         | 2.51E-03 | 2 |
| modification                                      | modification of gene                                     | 2.22E-04 | 2 |
| somatic hypermutation                             | somatic hypermutation                                    | 3.04E-04 | 2 |
| breakage                                          | breakage of chromosomes                                  | 3.91E-04 | 3 |
| sister chromatid exchange                         | sister chromatid exchange                                | 6.67E-04 | 2 |
| sister chromatid exchange                         | sister chromatid exchange of DNA                         | 3.70E-03 | 1 |
| sister chromatid exchange                         | sister chromatid exchange of chromosomes                 | 4.52E-03 | 1 |
| sister chromatid exchange                         | sister chromatid exchange of cervical cancer cell lines  | 6.16E-03 | 1 |
| breakdown                                         | breakdown of chromosomes                                 | 6.97E-04 | 2 |
| mutation                                          | mutation of gene                                         | 6.97E-04 | 2 |
| unwinding                                         | unwinding of DNA                                         | 1.45E-03 | 2 |
| unwinding                                         | unwinding of DNA fragment                                | 1.51E-02 | 1 |
| mismatch repair                                   | mismatch repair                                          | 1.71E-03 | 2 |
| chromosomal instability                           | chromosomal instability                                  | 1.87E-03 | 2 |
| double-stranded DNA break repair                  | double-stranded DNA break repair                         | 2.36E-03 | 3 |

|                                  |                                                      |          |   |
|----------------------------------|------------------------------------------------------|----------|---|
| double-stranded DNA break repair | double-stranded DNA break repair of B-lymphocyte     | 3.70E-03 | 1 |
| double-stranded DNA break repair | double-stranded DNA break repair of cells            | 7.41E-03 | 2 |
| double-stranded DNA break repair | double-stranded DNA break repair of epithelial cells | 9.02E-03 | 1 |
| conversion                       | conversion of gene                                   | 2.88E-03 | 1 |
| exchange                         | exchange of chromosomes                              | 2.88E-03 | 1 |
| exchange                         | exchange of sister chromatids                        | 1.59E-02 | 1 |
| joining                          | joining of DNA                                       | 4.09E-03 | 2 |
| DNA damage checkpoint            | DNA damage checkpoint                                | 5.26E-03 | 2 |
| organization                     | organization of chromosomes                          | 6.19E-03 | 2 |
| illegitimate recombination       | illegitimate recombination of plasmid DNA            | 7.79E-03 | 1 |
| quantity                         | quantity of nucleoprotein filaments                  | 8.20E-03 | 1 |
| abnormal morphology              | abnormal morphology of meiotic spindles              | 9.43E-03 | 1 |
| reorganization                   | reorganization of chromatin                          | 1.47E-02 | 1 |
| excision repair                  | excision repair                                      | 1.68E-02 | 2 |
| homologous pairing               | homologous pairing of DNA                            | 1.76E-02 | 1 |
| catabolism                       | catabolism of ATP                                    | 2.14E-02 | 2 |
| segregation                      | segregation of chromosomes                           | 2.34E-02 | 2 |
| instability                      | instability of DNA                                   | 2.44E-02 | 1 |
| ligation                         | ligation of DNA                                      | 3.24E-02 | 1 |
| elongation                       | elongation of DNA                                    | 4.86E-02 | 1 |
| <b>Cellular Compromise</b>       |                                                      |          |   |
| damage                           | damage of chromosomes                                | 1.86E-05 | 4 |
| breakage                         | breakage of chromosomes                              | 3.91E-04 | 3 |
| breakdown                        | breakdown of chromosomes                             | 6.97E-04 | 2 |
| micronucleation                  | micronucleation of breast cancer cell lines          | 4.11E-03 | 1 |
| atrophy                          | atrophy of motor neurons                             | 8.20E-03 | 1 |
| oxidative stress response        | oxidative stress response of fibroblast cell lines   | 2.88E-02 | 1 |
