# Supplementary material for: Susceptibility to DNA Damage as a Molecular Mechanism for Non-Syndromic Cleft Lip and Palate
Source: PubMed Central journal article supplement (PMC3680497; doi:10.1371/journal.pone.0065677), 2013-06-12
Supplement: pone.0065677.s006.pdf [file pone.0065677.s006.pdf]

**Table SIII: Validation of the microarray assays**

| <b>Gene</b>       | <b>p-value</b> |
|-------------------|----------------|
| <i>CDC45L</i> *   | 0.0058         |
| <i>PCOLCE2</i>    | 0.0062         |
| <i>BRCA1</i> *    | 0.0083         |
| <i>BRIP1</i> *    | 0.0101         |
| <i>DTL</i> *      | 0.0113         |
| <i>CDC25A</i> *   | 0.0117         |
| <i>RAD51AP1</i> * | 0.0118         |
| <i>E2F7</i>       | 0.0124         |
| <i>DKK1</i> *     | 0.0166         |
| <i>CDH2</i>       | 0.0169         |
| <i>LAMC2</i>      | 0.0182         |
| <i>CCDC99</i>     | 0.02           |
| <i>BLM</i> *      | 0.0209         |
| <i>CDC6</i> *     | 0.0238         |
| <i>DCK</i>        | 0.0244         |
| <i>RAD51</i> *    | 0.0279         |
| <i>HIST1H1B</i> * | 0.0496         |
| <i>PODXL</i>      | 0.1062         |
| <i>MTHFD2</i>     | 0.1113         |
| <i>ADAM12</i>     | 0.1616         |
| <i>PCDH10</i>     | 0.1679         |
| <i>HIST1H4B</i>   | 0.2584         |
| <i>AMIGO2</i>     | 0.3369         |
| <i>ITGA2</i>      | 0.3459         |

(\*) Genes pertaining to the BRCA1 similarity cluster
