# Supplementary material for: Susceptibility to DNA Damage as a Molecular Mechanism for Non-Syndromic Cleft Lip and Palate
Source: PubMed Central journal article supplement (PMC3680497; doi:10.1371/journal.pone.0065677), 2013-06-12
Supplement: pone.0065677.s007.pdf [file pone.0065677.s007.pdf]

**Table SIV: DEGs involved in the oxidative generation and repair of DSBs**

| <b>Symbol</b> | <b>Function</b>                                                                                                               | <b>Reference</b> |
|---------------|-------------------------------------------------------------------------------------------------------------------------------|------------------|
| <i>GSTM2</i>  | ROS detoxification, glutathione metabolism                                                                                    | [26]             |
| <i>NOX4</i>   | Production of ROS                                                                                                             | [27]             |
| <i>PTGS2</i>  | Peroxidase activity                                                                                                           | [28]             |
| <i>SMAD3</i>  | oxidative stress response/TGFB-mediated growth inhibition                                                                     | [29]             |
| <i>BRCA1</i>  | oxidative stress response/TGFB-mediated growth inhibition; Activation of base-excision repair/homologous recombination repair | [29], [31]       |
| <i>CLSPN</i>  | Stabilisation of the replication fork                                                                                         | [30]             |
| <i>TIPIN</i>  | Stabilisation of the replication fork                                                                                         | [30]             |
| <i>CDC45L</i> | New DNA synthesis during DNA repair                                                                                           | [32]             |
| <i>MCM10</i>  | New DNA synthesis during DNA repair                                                                                           | [33]             |
| <i>GINS1</i>  | New DNA synthesis during DNA repair                                                                                           | [32]             |
