# Supplementary material for: Susceptibility to DNA Damage as a Molecular Mechanism for Non-Syndromic Cleft Lip and Palate
Source: PubMed Central journal article supplement (PMC3680497; doi:10.1371/journal.pone.0065677), 2013-06-12
Supplement: pone.0065677.s008.pdf [file pone.0065677.s008.pdf]

**Table SV: Cell cultures used in the study**

| Code  | Gender | Clinical Status* | Microarray | qRT-PCR validation | Flow cytometry | H2O2 qRT-PCR |
|-------|--------|------------------|------------|--------------------|----------------|--------------|
| F3334 | female | control          | X          | X                  | X              | X            |
| F3347 | male   | control          | X          | X                  | X              | X            |
| F3960 | female | control          | X          | X                  |                |              |
| F4217 | male   | control          | X          | X                  | X              | X            |
| F4319 | female | control          | X          | X                  |                | X            |
| F4386 | female | control          | X          | X                  |                |              |
| F4243 | male   | CLP/UR           | X          | X                  | X              | X            |
| F4244 | male   | CLP/UR           | X          | X                  | X              | X            |
| F4245 | male   | CLP/UR           | X          | X                  | X              | X            |
| F4293 | female | CL/UL            | X          | X                  | X              | X            |
| F4294 | female | CL/UL            | X          | X                  | X              | X            |
| F4311 | male   | CL/UL            | X          | X                  | X              | X            |
| F4388 | male   | CLP/UR           | X          | X                  | X              | X            |
| F3333 | male   | control          |            |                    |                | X            |
| F5541 | male   | control          |            |                    |                | X            |
| F5703 | male   | control          |            |                    |                | X            |
| F6032 | female | control          |            |                    | X              | X            |
| F6119 | male   | control          |            |                    | X              | X            |
| F6681 | male   | control          |            |                    |                | X            |
| F4281 | male   | CLP/UL           |            |                    |                | X            |
| F4282 | male   | CLP/UL           |            |                    |                | X            |
| F5640 | female | CL/UL            |            |                    |                | X            |
| F5720 | male   | CLP/UR           |            |                    |                | X            |

(\*) CL = Cleft Lip; CLP = Cleft Lip and Palate; UL = Unilateral Left; UR = Unilateral Right
