# Supplementary material for: Susceptibility to DNA Damage as a Molecular Mechanism for Non-Syndromic Cleft Lip and Palate
Source: PubMed Central journal article supplement (PMC3680497; doi:10.1371/journal.pone.0065677), 2013-06-12
Supplement: pone.0065677.s009.pdf [file pone.0065677.s009.pdf]

**Table SVI: Primer sequences used for qRT-PCR experiments**

| <b>Gene</b>     | <b>Primer Forward (5'-3')</b> | <b>Primer Reverse (5'-3')</b> |
|-----------------|-------------------------------|-------------------------------|
| <i>ADAM12</i>   | TCTTGCTGCCGATTTGTGGTT         | AAGGGCGCACACACCTTAGTTT        |
| <i>AMIGO2</i>   | AGGTGCAAGAGTGACAGACACGG       | CTCTTTCCTGGGTTAGTCGGTGC       |
| <i>BLM</i>      | AGCACATTGTGTCAAGTCAAGTGGG     | CTGTGGCCGTAAGAGCCATCAC        |
| <i>BRCA1</i>    | AGGTGAAGCAGCATCTGGGTGTG       | TGCATGGTATCCCTCTGCTGAGTGG     |
| <i>BRIP1</i>    | AGTTCAGCTTCGGTTTGTCTCGGG      | AGCACACAGCTCGTAGGGGTTCA       |
| <i>CCDC99</i>   | GCCCTAGAGAAAGCTCGTGTAGC       | CCACCTCTGCAAACAAAGAGTTGC      |
| <i>CDC25A</i>   | TTCCCTACCTCAGAAGCTGTTGGG      | AGTGCAGGCAGCCACGAGATAC        |
| <i>CDC45L</i>   | GTGTGTGACACCCATAGGCCAG        | TCTAACCGTGTGCGCTTCTCAG        |
| <i>CDC6</i>     | TCAGGAAGAGGTATCCAGGCCAG       | AATACCAACACAATCATGGGGCCC      |
| <i>CDH2</i>     | CGCAGTGTACAGAATCAGTGGCGG      | AGTCGATTGGTTTGACCACGGTG       |
| <i>DCK</i>      | TCAAGCCACTCCAGAGACATGCTT      | TGCAGGAGCCAGCTTTCATGTT        |
| <i>DKK1</i>     | ATTGACAACACCAGCCGTACCCG       | AGTAATCCCGGGGCGAGCACATAG      |
| <i>DTL</i>      | TATGGAAGGTCTCCACACCTGG        | GTGAAGTCAGATGGACACCAGCAC      |
| <i>E2F7</i>     | CCTGTGCCAGAAGTTTCTAGCTCG      | GCGTCTCCTTTCCACACCAAGAC       |
| <i>HIST1H1B</i> | TCTTGCCACCATGTCCGAAACCG       | CGGCAGCCTTCTTAGTTGCCTTC       |
| <i>HIST1H4B</i> | ACCGAAAAGTGTGCGGGATAAC        | ACCGGAAATTCGTTAACCCAC         |
| <i>ITGA2</i>    | TGTTAGCGCYCAGTCAAGGCATTT      | TGCTGCACTGCATAGCCAAACTGT      |
| <i>LAMC2</i>    | AGGTTGATACCAGAGCCAAGAACGCT    | TCATCTACACTGAGAGGCTGGTCCAT    |
| <i>MTHFD2</i>   | TCTCTAATGTCTGCTTTGGCTGCC      | CAACAGCTTCATTTGAACTGCCG       |
| <i>PCDH10</i>   | CCAACGAGACTAAACACCAGCGAG      | CTATGTCGGCTTCTGGAATGCAG       |
| <i>PCOLCE2</i>  | TGCTGAACCAACGAAAGAGGGGA       | ATGTGCCACACACAAGTGACTCCT      |
| <i>PODXL</i>    | TTCCAGGAAGTCAGACCGTGGTC       | ACTGACCCCTGCCTCCTTAGTTC       |
| <i>RAD51</i>    | GGCAATGCAGATGCAGCTTGAAGT      | TTATGCCACACTGCTCTAACCGTG      |
| <i>RAD51AP1</i> | GCAGTGCCCTTTACAAAGATGGCT      | GTGGTGAAGTGTGGAAGTTCTTCA      |
| <i>E2F1</i>     | CCGCCATCCAGGAAAAGGTGTG        | TTCAGGTCGACGACACCGTCAG        |
| <i>GAPDH</i>    | TGCACCACCAACTGCTTAGC          | GGCATGGACTGTGGTCATGA          |
| <i>HPRT1</i>    | TGACACTGGCAAAACAATGC          | GGTCCTTTTACCAGCAAGCT          |
| <i>SDHA</i>     | TGGGAACAAGAGGGCATCTG          | CCACCACTGCATCAAATTCA          |
| <i>HMBS</i>     | GGCAATGCGGCTGCAA              | GGGTACCCACGCGAATCAC           |
| <i>Brca1</i>    | AGAAGAAAAGGGCCTTCACAATGTCC    | ACCATTTGTAAGCTGCATTCCCCTG     |
| <i>Brip1</i>    | GGGACGCGGACACACAAGCAG         | ACTTCCCGTGCTTGCCATCCAG        |
| <i>Msh2</i>     | TGGCATTAAAGGCTTCTCCCGGC       | ACCCATAACGCCAACGGAAGCTG       |
| <i>Blm</i>      | AGTGCTGCAACGACCCCTCG          | AGCCATGATCCTCATCTGGCATCC      |
| <i>Rad51</i>    | AGATGGAGCAGCCATGTTTCGCTG      | TCTCAGGTACAGCCTGGTGGTTG       |
| <i>Rad51ap1</i> | AAGTACCATCTCAAGCCAAGGC        | TTTCTGAACCTTACCAGTGGCG        |
| <i>B2m</i>      | TCGCGGTGCGTTCAGTCGTC          | TTCTCCGGTGGGTGGCGTGA          |
| <i>Tbp</i>      | CCACACCAGCTTCTGAGAGC          | GACTGCAGCAAATCGCTTGGG         |
| <i>Tubb5</i>    | GACAGTGTGGCAACCAGATCG         | CTGCAGGTGCGCTGTCACCGT         |
| <i>Ywhaz</i>    | TGAGCAGAAGACGGAAGGTGC         | GCGAAGCATTGGGGATCAAGA         |
